# Supplementary material
Source: PubMed Central journal article supplement (PMC7955409)
Supplement: bloodBLD2020007897-suppl1.pdf [file bloodBLD2020007897-suppl1.pdf]

## **Supplemental data**

### **Plasmacytoid dendritic cell expansion defines a distinct subset of *RUNX1* mutated acute myeloid leukemia**

Wenbin Xiao<sup>1,2,\*</sup>, Alexander Chan<sup>1</sup>, Michael R. Waarts<sup>2</sup>, Tanmay Mishra<sup>2</sup>, Ying Liu<sup>1</sup>, Sheng F. Cai<sup>2,3</sup>, Jinjuan Yao<sup>4</sup>, Qi Gao<sup>1</sup>, Robert L. Bowman<sup>2</sup>, Richard Koche<sup>5</sup>, Isabelle S. Csete<sup>2</sup>, Nicole DelGaudio<sup>2</sup>, Andriy Derkach<sup>6</sup>, Jeeyeon Baik<sup>1</sup>, Sophia Yanis<sup>1</sup>, Christopher Famulare<sup>7</sup>, Minal Patel<sup>7</sup>, Maria E. Arcila<sup>1,4</sup>, Maximilian Stahl<sup>3</sup>, Raajit K. Rampal<sup>2,3</sup>, Martin S. Tallman<sup>3</sup>, Yanming Zhang<sup>8</sup>, Ahmet Dogan<sup>1</sup>, Aaron D. Goldberg<sup>3</sup>, Mikhail Roshal<sup>1</sup>, Ross L. Levine<sup>2,3,5,7,\*</sup>

#### Supplemental Methods

Supplemental Figure 1  
Supplemental Figure 2  
Supplemental Figure 3  
Supplemental Figure 4  
Supplemental Figure 5  
Supplemental Figure 6  
Supplemental Table 1  
Supplemental Table 2  
Supplemental Table 3  
Supplemental Table 4  
Supplemental Table 5  
Supplemental Table 6

## **Supplemental Methods**

### **Patients**

A cohort of AML patients without pDC expansion was reported previously<sup>1</sup>. A cohort of patients with BPDCN was also identified through similar natural language search. The normal control cohort was previously described with addition of negative marrow specimens (by flow cytometry and morphology) from patients of lymphoma staging<sup>1</sup>. Written informed consent was received from participants prior to inclusion in the study.

### **Human Cells**

Umbilical cord blood samples from healthy neonates were obtained from the New York Blood Center under an agreement that includes approval for ethical laboratory research use. Mononuclear cells were separated by density centrifugation using Ficoll-Paque (GE Healthcare) and ammonium chloride red cell lysis. CD34 positive cells were positively selected by magnetic microbeads purchased from Miltenyi. Cryopreserved bone marrow aspirate or peripheral blood mononuclear cell specimens collected at diagnosis were retrieved from our institutional, IRB-approved biospecimen bank.

### **Cell culture**

10,000 flow cytometry-sorted CD34 positive cells were cultured for 14 days in StemSpan serum free culture medium (StemCell Technologies) supplemented with  $\beta$ -mercaptoethanol and penicillin/streptomycin at 37 °C, together with the following cytokines (Peprotech): human fms-like tyrosine kinase 3 ligand (hFLT3L) (100 ng/mL), human stem cell factor (hSCF) (10 ng/mL), human thrombopoietin (hTPO) (50 ng/mL), and Stemregenin 1 (SR1) (1  $\mu$ g/mL). Human IL-7 was also included in some experiments. Half of the medium containing the cytokine cocktail was replaced every 3-4 days.

### **Patient-derived xenograft models and tagraxofusp administration**

NOD/SCID/IL-2Rg-null female mice were purchased from Taconic and maintained under specific pathogen-free conditions. Mice ages 6–7 weeks were sub-lethally irradiated (2 Gy) up to 24 hr before intravenous (i.v.) injection of various numbers of unsorted human PBMCs, unsorted bone marrow cells or 500,000 sorted leukemic blasts or pDCs. In the treatment

experiments, tagraxofusp (gift from Stemline Therapeutics) was diluted in PBS to 10 µg/mL and was administered intraperitoneally (i.p.) at 0.1 mg/kg/d (low dose cohort) or 0.2 mg/kg/d (high dose cohort) for 5 days. Mice were monitored every 1–2 weeks by peripheral blood sampling. All experiments involving mice were performed in accordance with national and institutional guidelines for animal care and were approved by IACUC at MSK.

### **Flow cytometry and Cell sorting**

For clinical samples, multiparameter flow cytometry was performed on bone marrow aspirates at diagnosis and/or relapse. Briefly, up to 1.5 million cells from freshly drawn bone marrow aspirate were stained with 4-6 10-“color” panels as previously reported, washed, and acquired on a Canto-10 cytometer (BD Biosciences, San Jose, CA)<sup>1</sup>. pDC tubes were described in supplemental Table 1. The results were analyzed with custom Woodlist software (generous gift of Wood BL, University of Washington). Cryopreserved live cells were sorted into myeloid blasts, pDCs, monocytes and T cells (as somatic controls) using FACS-Aria Fusion cell sorter (BD Biosciences, San Jose, CA). For cell cultures and PDX samples, similar sample preparation processes were followed. The samples were acquired on a Fortessa cytometry (BD Biosciences, San Jose, CA). The results were analyzed with FlowJo™ Software version 10.6.1 (Ashland, OR: Becton, Dickinson and Company; 2019). The bone marrow cells from PDX mice were sorted using SH800S cell sorter (Sony Biotechnology, San Jose, CA).

### **Chromosome and FISH analysis:**

Conventional chromosome analysis of bone marrow, peripheral blood or fresh tissue was performed following standard procedures with overnight short-term culturing without mitogen. At least 20 metaphase cells were analyzed for a complete chromosome study. The chromosome abnormalities were recorded as per ISCN (2016). In most cases, FISH analysis was performed for recurring chromosome abnormalities in AML and ALL, including t(9;22), MLL, and t(12;21), and in a few cases with inadequate chromosome analysis, extensive FISH tests for t(8;21),

inv(16), t(6;9) and IKZF1 were also performed. All FISH probes were from Abbott Molecular (Des Plaines, IL), and its quality and performance were validated in the laboratory.

### **Sequencing studies**

Bone marrow samples obtained were submitted to a 28-gene amplicon capture-based next-generation sequencing (NGS) assay (RainDance) or a larger 400-gene amplicon capture-based next-generation sequencing assay (MSK IMPACT) as previously described. Sorted cells of specific populations from pDC-AML patients were submitted for MSK IMPACT testing. Variants were detected through our clinical workflow.

CD34+ blasts or pDCs were sorted from AML patients or healthy controls into RNA lysis buffer. Total RNA was isolated and RNA integrity and concentration were assessed using a BioAnalyzer. RNA sequencing libraries were generated using SMARTerAmpSeq. Multiplexed libraries were sequenced at the Memorial Sloan Kettering Cancer Center's core sequencing facility. Approximately 20-30 million paired-end 50 bp reads were sequenced per sample on a Hi-Seq 4000. Fastq files were mapped to the human genome (hg38) and genome wide transcript counting was performed using featureCounts. Differentially expressed genes (DEGs) were identified with DESeq2 and genes with an FDR of 5% were used for downstream analysis. Gene ontology analysis was performed using clusterProfiler. Normalized ssGSEA scores were calculated using normalized expression values and previously published pDC gene sets as input. The algorithm gene set variation analysis (GSVA) was applied<sup>2-4</sup>.

### **Statistics**

Statistical analyses were performed using Prism software (GraphPad) or DESeq2 for RNA-seq, as indicated. Data are plotted as mean  $\pm$  SD, except as where indicated in legends. Statistical significance calculations on pairwise comparisons were performed using 2-tailed t tests. Survival analyses were performed on curves generated using the Kaplan-Meier method and groups were compared using the log-rank test. Cox proportional hazards regression models were used to estimate the hazard ratios (HR) and 95% confidence intervals (CIs), for high level of pDC (2%

cutoff), on the risk of mortality, without (univariate) and with adjusting for age at diagnosis (years, continuous) and ELN risk. A p value less than 0.05 was considered significant.

Fig S1

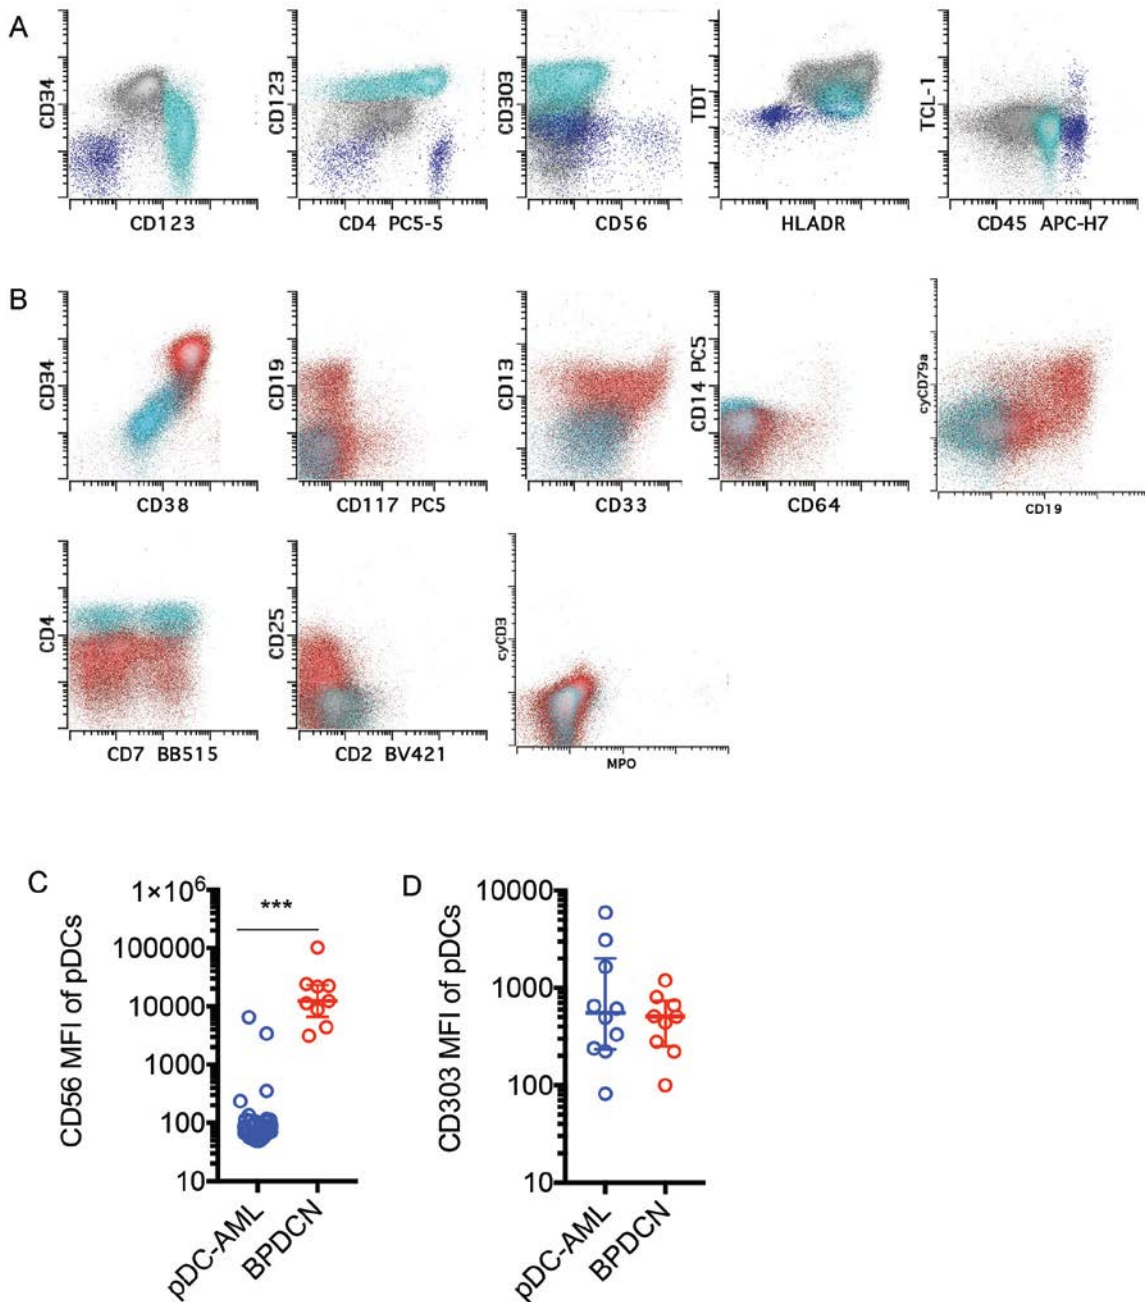

Supplemental Figure 1. Detailed immunophenotype of pDCs and leukemic blasts from a representative pDC-AML patient. A. Flow plots of DC tubes (aqua, pDCs; grey, blasts; blue, lymphocytes). B. Flow plots of myeloid and intracytoplasmic tubes (aqua, pDCs; red, blasts). The pDCs are positive for CD123, CD4, HAL-DR, dim CD45, dim CD34, dim CD38, CD7 (subset) and dim CD33, but negative for CD56, TCL-1, TdT, CD117, CD2, CD5(not shown), CD8 (not shown), CD25, CD13, CD14, CD64, CD19, cyCD79a, cyCD3 and MPO. The blasts are positive for CD34, CD38, HLA-DR, CD117 (minor subset), intermediate CD123, intermediate CD4, dim TdT, CD13, CD33, CD7 (subset), CD25 (subset), CD19 (subset) and cyCD79 (subset), but negative for CD303, CD56, CD14, CD2, cyCD3, MPO and TCL-1. The blasts show myeloid and B lineage mixed phenotype. C, CD56 expression on pDCs of pDC-AML and BPDCN. 4 patients had MFI>200 (2 of them had MFI>1000). In contrast, 9/9 BPDCN patients had MFI>1000. The two pDC-

AML patients with CD56>1000 had pDCs of 7% and 13% in the marrow. One had history of CMML and was negative for RUNX1 mutation. Neither had skin involvement. **D, CD303 expression on pDCs of pDC-AML and BPDCN.** CD303 is expressed in 7/10 pDC-AML and 6/9 BPDCN (MFI 300 was chosen as cutoff).

Fig S2

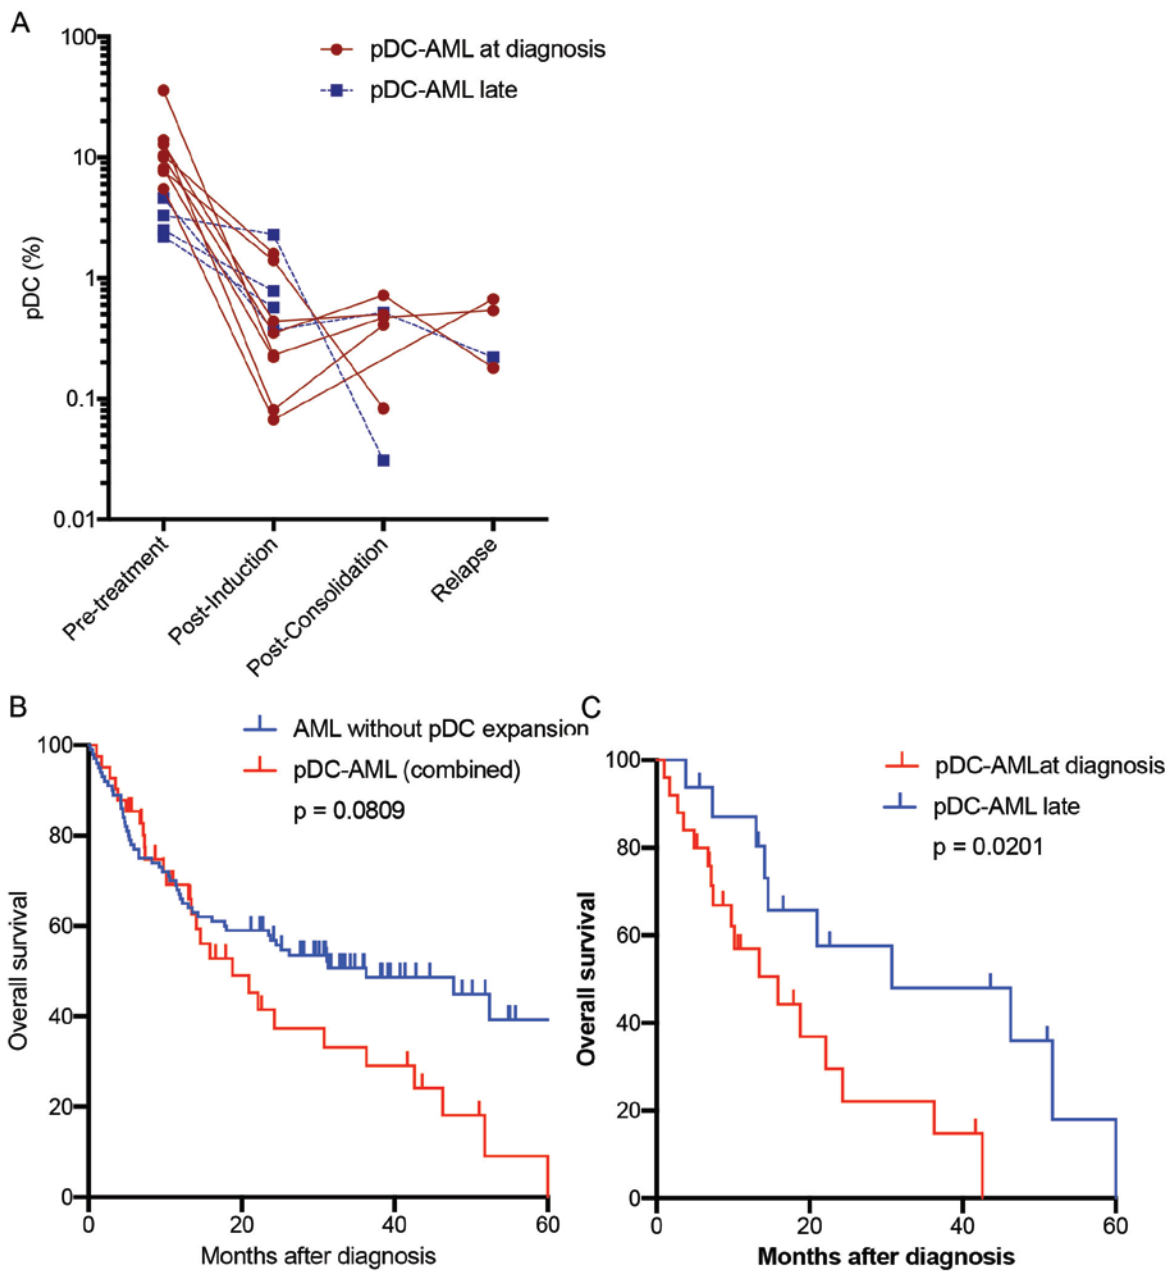

Supplemental Figure 2. Dynamics of pDC after treatment (A) and Kaplan-Meier survival curve (B and C).



Fig S3

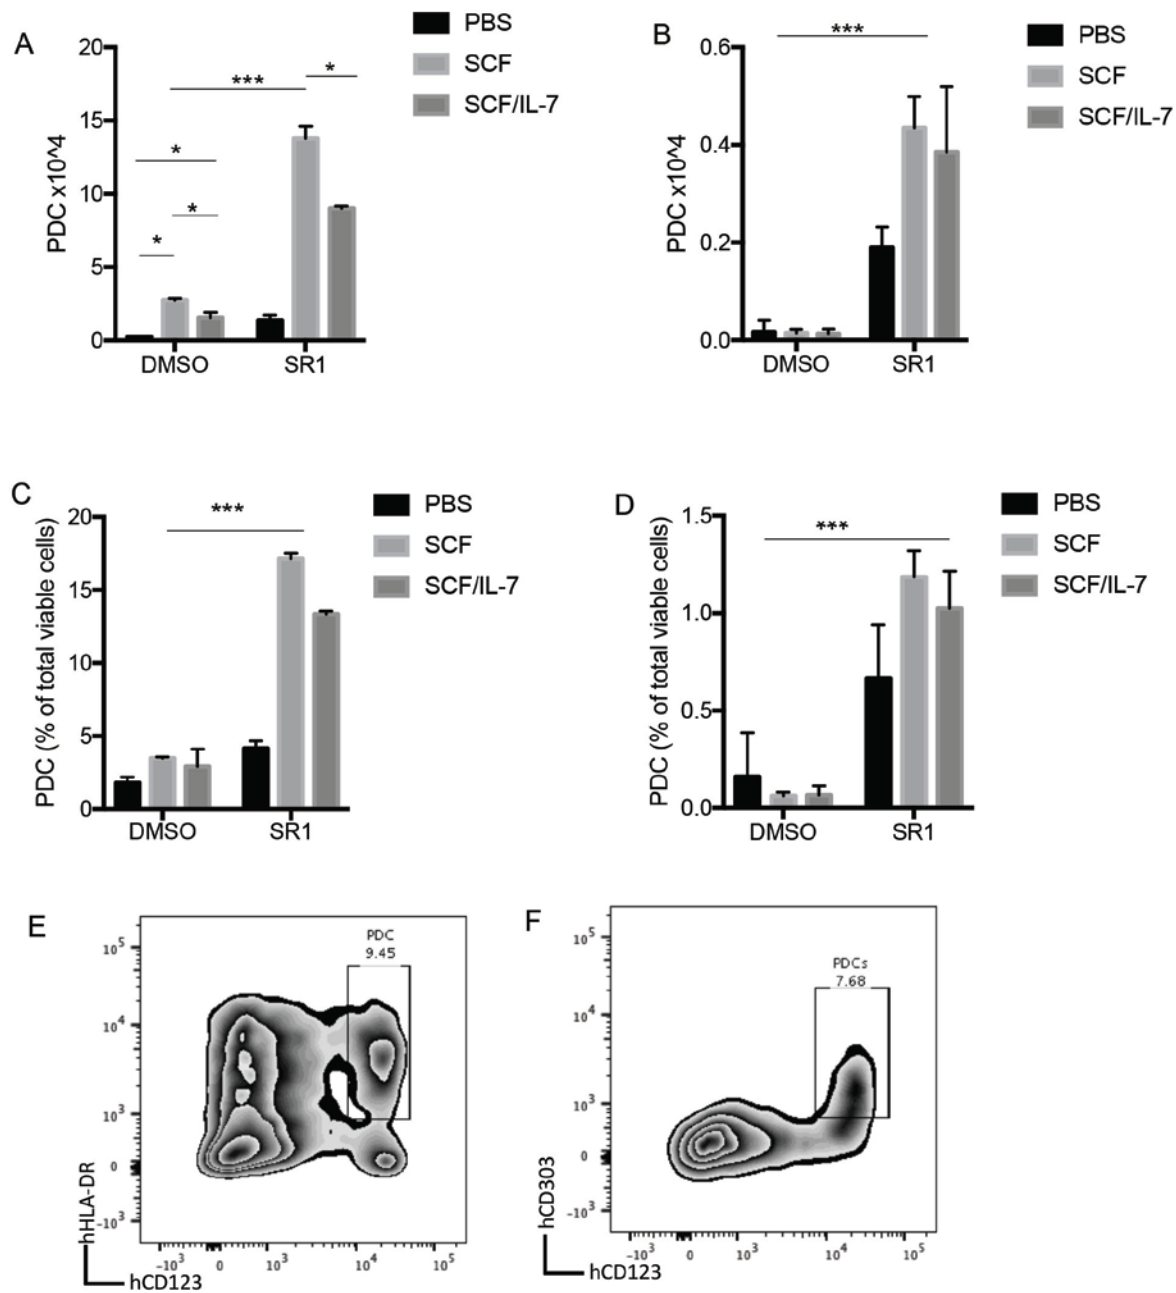

Supplemental Figure 3. pDC differentiation facilitated by SR1. A-B, Purified CD34 positive cells from cord blood (A and C) and G-CSF mobilized peripheral blood mononuclear cells (B and D) were cultured in STEMSPAN serum free medium with hFLT3L 100ng/ml, hTPO 50 ng/ml and cytokines (SCF 10 ng/ml or IL-7 10 ng/ml) or SR1 (1  $\mu$ M) as indicated for 2 weeks. E-F, Cells cultured in vitro for 2 weeks (from panel A) with addition of SR1 and SCF 10 ng/ml were immunophenotyped by flow cytometry. pDCs were identified as DAPI-CD3-CD19-CD56-CD14-Fc $\epsilon$ RI-CD123<sup>+</sup>HLA-DR<sup>+</sup>CD303<sup>+</sup> population. Under these conditions we were able to efficiently differentiate pDCs from cord blood and peripheral blood CD34 positive cells. pDC output from cord blood CD34 positive cells was increased by nearly 10-fold by adding SR1 (A,C). pDC output from G-CSF mobilized peripheral blood CD34 positive HSPC was 10-fold

lower than that from cord blood HSPC (**B,D**). The pDCs differentiated from cord blood cells showed characteristic surface expression of CD123, HLA-DR and CD303 (**E-F**) and plasmacytoid cytomorphology (data not shown).

Fig S4

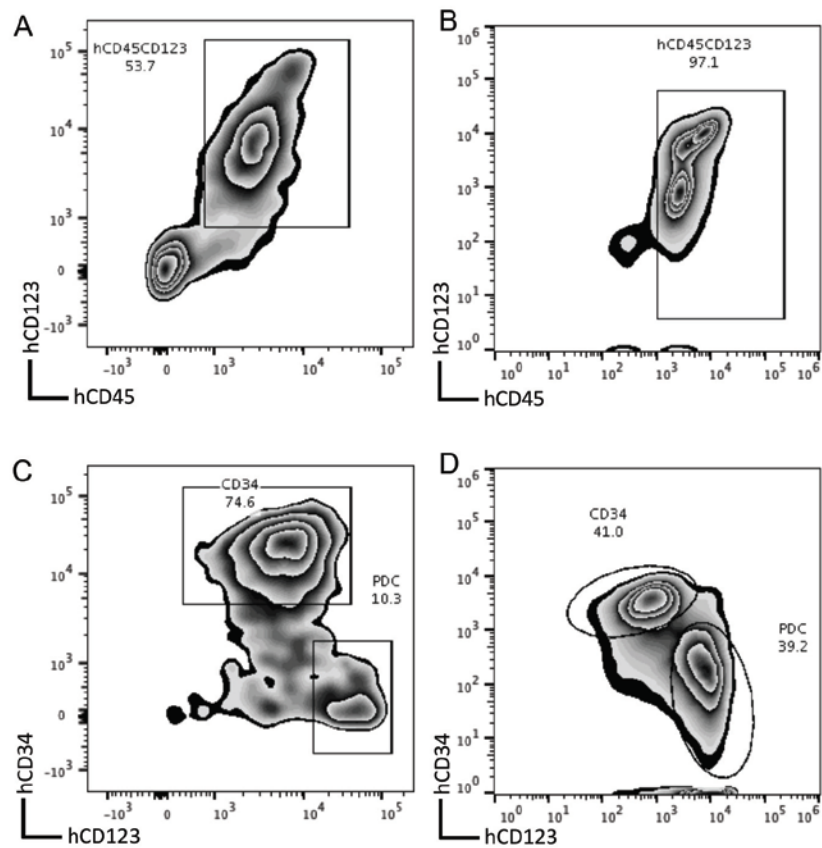

Supplemental Figure 4. Immunophenotype of primary NSG mice receiving pDC-AML cells. A and B, hCD45 engraftment in peripheral blood (A) and bone marrow (B) 6 months after transplant. C and D, Leukemic blasts and pDCs in hCD45 positive cells from peripheral blood (C) and bone marrow (D).

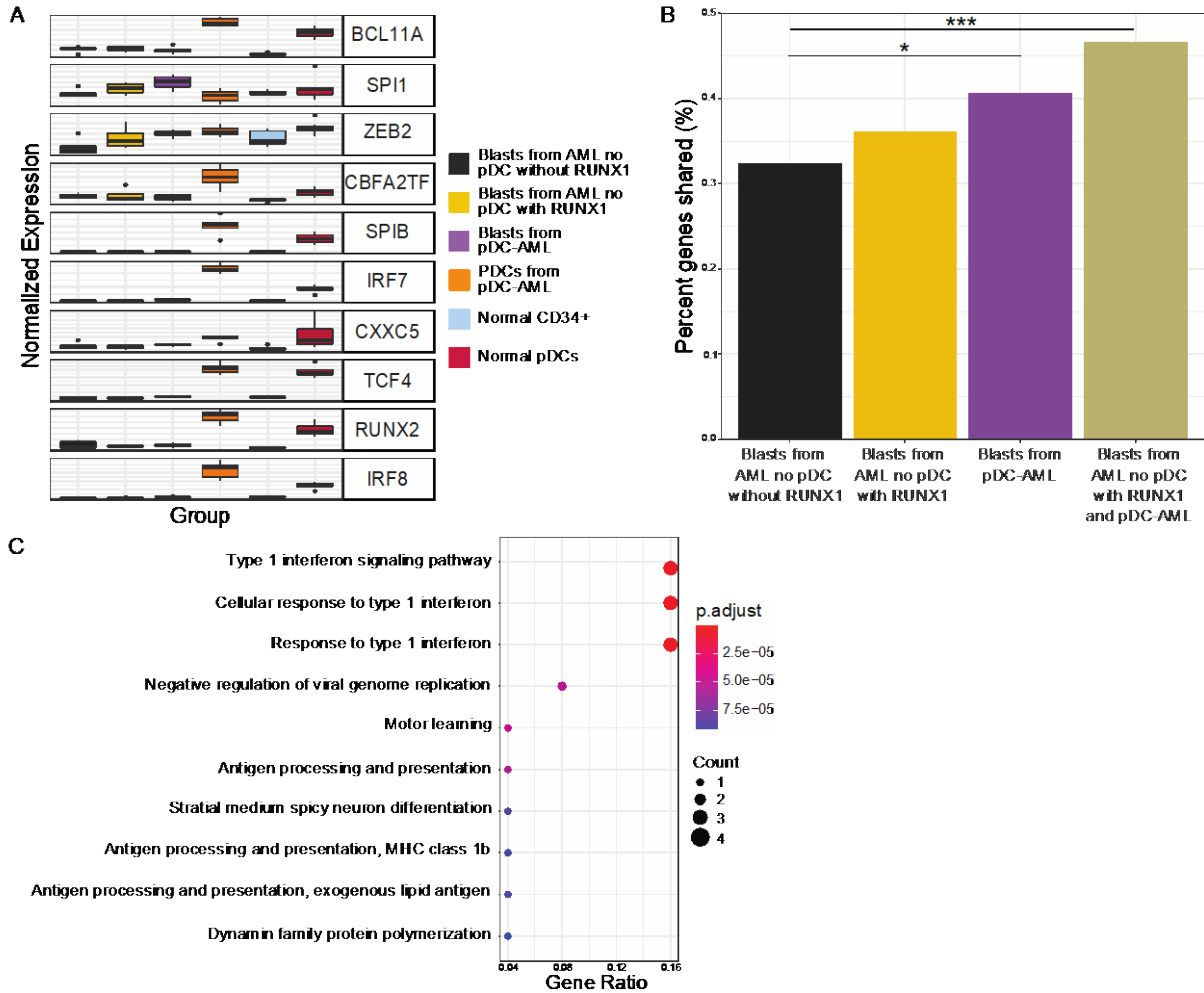

Supplemental Figure 5. A, Expression levels of key pDC genes. B, Shared pDC transcriptional program for each group. C, Gene ontology analysis showing upregulated pathways in the subset of 30 genes from Figure 5C.

Fig S6

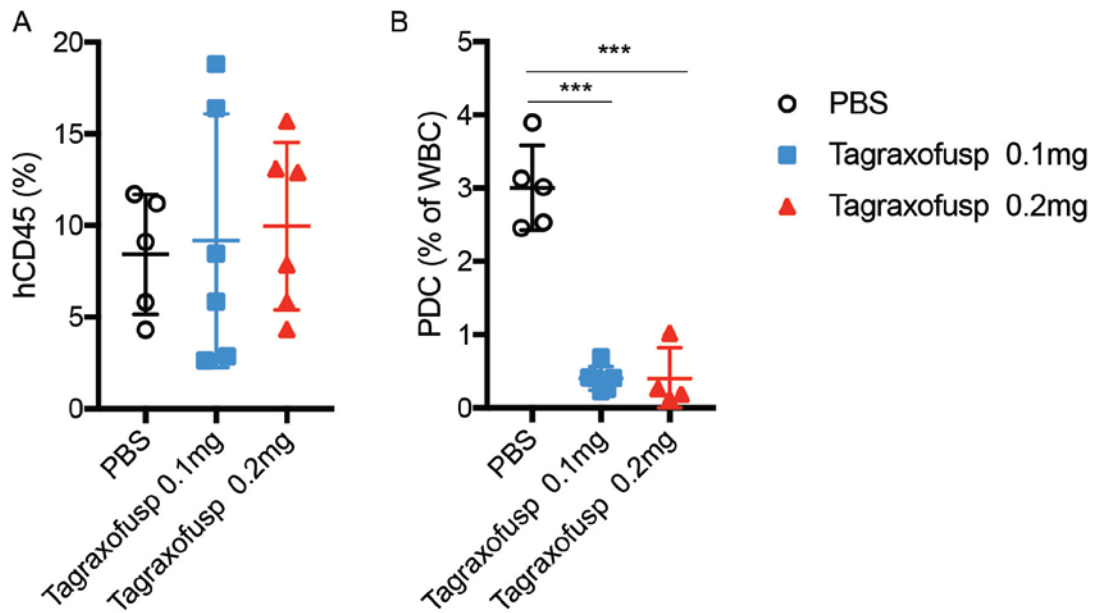

Supplemental Figure 6. Tagraxofusp treatment eliminates pDCs in secondary NSG recipients. A, hCD45 positive cells in bone marrow prior to treatment were comparable between 3 cohorts. B, pDC proportions in total WBC of peripheral blood were nearly eliminated by one cycle of tagraxofusp treatment. mean±SD. \*\*\*p<0.0001

Supplemental Table 1 List of antibodies for pDC-AML immunophenotype by flow cytometry

| M1 Tube                           | M2 Tube                           | M3 Tube                       | Intra Tube                           | pDC1 Tube                           | pDC2 Tube                                 | pDC3 Tube                         |
|-----------------------------------|-----------------------------------|-------------------------------|--------------------------------------|-------------------------------------|-------------------------------------------|-----------------------------------|
| CD15 FITC (80H5, BC)              | CD64 FITC (22, BC)                | CD7 BB515 (M-T701, BD)        | cytoplasmic MPO FITC (CLB-MPO-1, BC) | CD303 (BCDA-2) PE (AC144, Miltenyi) | cytoplasmic TdT control FITC (Supertechs) | cytoplasmic TdT FITC (Supertechs) |
| CD33 PE (D3HL60.251, BC)          | CD123 PE (9F5, BD)                | CD56 PE (N901 [HLDA6], BC)    | cytoplasmic CD79a PE (HM47, BC)      | CD123 APC (9F5, BD)                 | CD34 PERCP-CY5.5 (8G12, BD)               | CD34 PERCP-CY5.5 (8G12, BD)       |
| CD117 PC5 (104D2D1, BC)           | CD14 PC5 (RMO052, BC)             | CD5 Percp-cy 5.5 (L17F12, BD) | cytoplasmic CD3 APC (UCHT1, BC)      | CD56 PC7 (N901 [HLDA6], BC)         | CD123 APC (9F5, BD)                       | CD123 APC (9F5, BD)               |
| CD13 PE-CY7 (L138, BD)            | CD13 PE-CY7 (L138, BD)            | CD34 APC (581, BC)            | CD34 PERCP-CY5.5 (8G12, BD)          | CD4 PC5.5 (13B8.2, BC)              | CD45 APC-H7 (2D1, BD)                     | CD45 APC-H7 (2D1, BD)             |
| CD34 APC (581, BC)                | CD34 APC (581, BC)                | CD33 PC7 (D3HL60.251, BC)     | CD19 PC7 (J3-119, BC)                | CD45 APC-H7 (2D1, BD)               | HLADR PACIFIC BLUE (Immu-357, BC)         | HLADR PACIFIC BLUE (Immu-357, BC) |
| CD71 APC-A700 (YDJ1.2.2, BD)      | CD16 APC -A700 (3G8, BC)          | CD4 APC-A700 (13B8.2, BC)     | CD45 APC-H7 (2D1, BD)                | HLADR PACIFIC BLUE (Immu-357, BC)   |                                           |                                   |
| CD38 APC-A750 (LS198-4-3, BC)     | CD38 APC-A750 (LS198-4-3, BC)     | CD38 APC-A750 (LS198-4-3, BC) | CD3 BV421 (UCHT1, BD)                |                                     |                                           |                                   |
| HLADR PACIFIC BLUE (Immu-357, BC) | HLADR PACIFIC BLUE (Immu-357, BC) | CD2 BV421 (RPA-2.10, BD)      |                                      |                                     |                                           |                                   |
| CD45 V500c (2D1, BD)              | CD45 V500c (2D1, BD)              | CD45 V500c (2D1, BD)          |                                      |                                     |                                           |                                   |
| CD19 BV605 (HIB19, BioL)          | CD11b BV605 (1CRF44, BioL)        | CD25 BV605 (BC96, BioL)       |                                      |                                     |                                           |                                   |

BC: Beckman Coulter, Miami, FL; BD: BD Biosciences, San Jose, CA; BioL: BioLegend, San Jose, CA; Miltenyi: Miltenyi Biotec, San Jose, CA; Supertechs: Supertechs, Inc., Rockville, MD

**Supplemental Table 2 Immunophenotype of pDC in pDC-AML**

| Markers | pDC-AML at diagnosis<br>(n = 26)<br>(FC available n = 25) | pDC-AML late<br>(n=16)<br>(FC available n = 16) | pDC-AML (combined)<br>(n=42)<br>(FC available n = 41) | BPDCN <sup>a</sup> | Normal pDCs <sup>a</sup> |
|---------|-----------------------------------------------------------|-------------------------------------------------|-------------------------------------------------------|--------------------|--------------------------|
| CD4     | 20/20 (100%)                                              | 9/9 (100%)                                      | 29/29 (100%)                                          | 37/37 (100%)       | 21/21 (100%)             |
| CD123   | 25/25 (100%)                                              | 15/15 (100%)                                    | 41/41 (100%)                                          | 37/37 (100%)       | 21/21 (100%)             |
| HLA-DR  | 25/25 (100%)                                              | 15/15 (100%)                                    | 41/41 (100%)                                          | 37/37 (100%)       | 21/21 (100%)             |
| CD303   | 5/8 (63%)                                                 | 2/2 (100%)                                      | 7/10 (70%)                                            | 7/16 (44%)         | 21/21 (100%)             |
| CD56    | 3/21 (14%)                                                | 1/9 (11%)                                       | 4/30 (13%)                                            | 36/37 (97%)        | Small population         |
| TCL-1   | 1/7 (14%)                                                 | 2/2 (100%)                                      | 3/9 (33%)                                             |                    |                          |
| TdT     | 4/8 (50%)                                                 | 0/2 (0%)                                        | 4/10 (40%)                                            | 4/16 (25%)         |                          |
| CD34    | 14/25 (56%)                                               | 11/16 (69%)                                     | 25/41 (61%)                                           | 0/27 (0)           |                          |
| CD38    | 24/25 (96%)                                               | 16/16 (100%)                                    | 40/41 (98%)                                           | 30/34 (88%)        | 21/21 (100%)             |
| CD2     | 6/20 (30%)                                                | 2/9 (22%)                                       | 8/29 (28%)                                            | 5/27 (19%)         | 21/21 (100%)             |
| CD5     | 3/20 (15%)                                                | 2/9 (22%)                                       | 5/29 (17%)                                            | 1/30 (3%)          |                          |
| CD7     | 8/20 (40%)                                                | 4/9 (44%)                                       | 12/29 (41%)                                           | 21/33 (64%)        | 21/21 (100%)             |
| CD13    | 9/25 (36%)                                                | 8/16 (50%)                                      | 17/41 (41%)                                           | 0/30 (0)           |                          |
| CD14    | 0/25 (0%)                                                 | 0/16 (0%)                                       | 0/41 (0%)                                             |                    |                          |
| CD33    | 4/21 (19%)                                                | 7/12 (58%)                                      | 11/33 (33%)                                           | 16/33 (48%)        | 21/21 (100%)             |
| CD64    | 0/25 (0%)                                                 | 1/16 (6%)                                       | 1/41 (2%)                                             |                    |                          |

<sup>a</sup> Data were extracted from Wang, W., et al. (2020). "Immunophenotypic characterization of reactive and neoplastic plasmacytoid dendritic cells permits establishment of a 10-color flow cytometric panel for initial workup and residual disease evaluation of blastic plasmacytoid dendritic cell neoplasm." *Haematologica*: haematol.2020.247569.

Supplemental Table 3 Immunophenotype of blasts in pDC-AML

| Markers                                               | pDC-AML at diagnosis<br>(n = 26) | pDC-AML late<br>(n=16) | pDC-AML (combined)<br>(n=42) |
|-------------------------------------------------------|----------------------------------|------------------------|------------------------------|
|                                                       | (FC available n = 25)            | (FC available n = 16)  | (FC available n = 41)        |
| Cross lineage antigen expression                      | 6 (24%)                          | 7 (44%)                | 13 (32%)                     |
| T-cell markers <sup>a</sup> (≥2 aberrantly expressed) | 4 (16%)                          | 5 (31%)                | 9 (22%)                      |
| B-cell markers <sup>b</sup> (≥2 aberrantly expressed) | 2 (8%)                           | 2 (13%)                | 4 (10%)                      |
| Meets MPAL criteria                                   | 5 (20%)                          | 3 (19%)                | 8 (20%)                      |
| T-cell markers                                        |                                  |                        |                              |
| Number abnormal / number tested (%)                   |                                  |                        |                              |
| CD2                                                   | 4/25 (16%)                       | 2/16 (13%)             | 6/41 (15%)                   |
| CD3 (cytoplasmic)                                     | 0/19 (0%)                        | 2/5 (40%)              | 2/24 (8%)                    |
| CD5                                                   | 2/25 (8%)                        | 2/16 (13%)             | 4/41 (10%)                   |
| CD7                                                   | 10/25 (40%)                      | 9/16 (56%)             | 19/41 (46%)                  |
| B-cell markers                                        |                                  |                        |                              |
| CD10                                                  | 0/24 (0%)                        | 2/5 (40%)              | 2/29 (7%)                    |
| CD19                                                  | 7/25 (28%)                       | 4/16 (25%)             | 11/41 (27%)                  |
| CD79a (cytoplasmic)                                   | 4/14 (29%)                       | 2/5 (40%)              | 6/19 (32%)                   |
| Other markers                                         |                                  |                        |                              |
| CD4                                                   | 2/25 (8%)                        | 0/16 (0%)              | 2/41 (5%)                    |
| CD11b                                                 | 11/25 (44%)                      | 4/16 (25%)             | 15/41 (37%)                  |
| CD13                                                  | 24/25 (96%)                      | 11/16 (69%)            | 35/41 (85%)                  |
| CD14                                                  | 0/25 (0%)                        | 0/16 (0%)              | 0/41 (0%)                    |
| CD15                                                  | 13/25 (52%)                      | 2/16 (13%)             | 15/41 (37%)                  |
| CD25                                                  | 10/25 (40%)                      | 5/16 (31%)             | 15/41 (37%)                  |
| CD33                                                  | 23/25 (92%)                      | 14/16 (88%)            | 37/41 (90%)                  |
| CD34                                                  | 17/25 (68%)                      | 12/16 (75%)            | 19/41 (46%)                  |
| CD38                                                  | 14/25 (56%)                      | 8/16 (50%)             | 22/41 (54%)                  |
| CD56                                                  | 3/25 (12%)                       | 3/16 (19%)             | 6/41 (15%)                   |
| CD64                                                  | 4/25 (16%)                       | 2/16 (13%)             | 6/41 (15%)                   |
| CD117                                                 | 24/25 (96%)                      | 14/16 (88%)            | 38/41 (93%)                  |
| CD123                                                 | 21/25 (84%)                      | 10/16 (63%)            | 31/41 (76%)                  |
| HLA-DR                                                | 20/25 (80%)                      | 12/16 (75%)            | 32/41 (78%)                  |



**Supplemental Table 4 Clinicopathologic features of 42 patients with pDC-AML**

| Patient    | Sex | Age | Diagnosis (WHO Category) | Known MDS | Known CMML | Extramedullary Disease | Flowp pDCs (%) | Karyotype                                                                                                       | Survival status | Overall Survival |
|------------|-----|-----|--------------------------|-----------|------------|------------------------|----------------|-----------------------------------------------------------------------------------------------------------------|-----------------|------------------|
| Patient 01 | M   | 78  | AML-MRC                  | yes       | no         | No                     | 2.3%           | 45,XY,-7[4]/46,XY[17]                                                                                           | Died            | 15.9             |
| Patient 02 | M   | 77  | AML NOS                  | no        | no         | No                     | 3.5%           | 47,XY,+13[2]/48,idem,+19[14]/46,XY[4]                                                                           | Died            | 13.4             |
| Patient 03 | F   | 73  | AML NOS                  | no        | no         | Leukemia cutis         | 3.7%           | not performed                                                                                                   | Died            | 6.7              |
| Patient 04 | M   | 67  | AML NOS                  | no        | no         | Leukemia cutis         | 14.0%          | 47,XY,+13 [14]/46,XY [6]                                                                                        | Alive           | 41.7             |
| Patient 05 | M   | 80  | AML NOS                  | yes       | no         | No                     | 3.7%           | 45,X,-Y[19]/46,XY[1]                                                                                            | Died            | 24.3             |
| Patient 06 | M   | 72  | AML NOS                  | no        | no         | No                     | 20.5%          | 46,XY[20]                                                                                                       | Died            | 1.0              |
| Patient 07 | M   | 77  | AML NOS                  | no        | no         | No                     | 5.1%           | 45,X,-Y,del(2)(p13p21)[21]                                                                                      | Died            | 3.5              |
| Patient 08 | M   | 47  | AML-MRC                  | no        | no         | Leukemia cutis         | 5.5%           | 46,XY,add(7)(q32)[6]/ 92,XXYY[5]/46,XY[9]<br>46,XY,del(20)(q11.2q13.1)[16]/46,idem,der(7)t(1;7)(q21;q22)[5]     | Alive           | 9.8              |
| Patient 09 | M   | 74  | AML-MRC                  | no        | no         | No                     | 35.9%          | 48,XY,+8,+21[3]/46,XY[17]                                                                                       | Died            | 18.8             |
| Patient 10 | M   | 72  | AML-MRC                  | no        | no         | No                     | 5.8%           | 46,XY[20]                                                                                                       | Died            | 2.8              |
| Patient 11 | M   | 79  | AML-MRC                  | yes       | no         | No                     | 14.0%          | 46,XX,t(8;21)(q11.2;q22)[2]/46,idem,del(3)(q12q29),del(17)(p11.2)[4]/46,XX[13]                                  | Alive           | 6.9              |
| Patient 12 | F   | 62  | AML-MRC                  | yes       | no         | No                     | 4.1%           | 46,XX[20]                                                                                                       | Alive           | 0.0              |
| Patient 13 | F   | 44  | AML NOS                  | no        | no         | No                     | 7.7%           | 46,XY[1]/Outside 11/12/2018: 45,X-Y[3]/[46,XY[17]                                                               | Alive           | 10.6             |
| Patient 14 | M   | 72  | t-AML                    | no        | no         | No                     | 2.6%           | 46,XX,t(15;21)(q21;q22)[17]/46,XX[3]                                                                            | Alive           | 5.3              |
| Patient 15 | F   | 76  | AML-MRC                  | yes       | no         | No                     | 9.8%           | 46,XX,del(5)(q22q35) [20]                                                                                       | Died            | 4.9              |
| Patient 16 | M   | 74  | AML NOS                  | no        | no         | No                     | 2.5%           | 46,XY[20]                                                                                                       | Died            | 36.3             |
| Patient 17 | F   | 14  | t-AML                    | tMDS      | no         | No                     | 10.4%          | 46,XY[20]                                                                                                       | Died            | 7.1              |
| Patient 18 | M   | 61  | AML NOS                  | no        | no         | No                     | 12.9%          | 79-88<4n>,XXYY,-3,del(5)(q23q35)x2,-7,-7,-11,-16,-17,-21,inc[cp2]/46,XY[12]                                     | Alive           | 8.7              |
| Patient 19 | M   | 68  | AML NOS                  | no        | no         | No                     | 8.1%           | 46,XY[20]                                                                                                       | Died            | 7.4              |
| Patient 20 | M   | 75  | AML-MRC                  | yes       | no         | Leukemia cutis         | 8.2%           | 47,XY,t(4;6)(q31;q27),+13[1]/90~92,idemx2,inc[2]/46,XY[11]                                                      | Died            | 9.8              |
| Patient 21 | M   | 81  | AML NOS                  | no        | no         | No                     | 5.4%           | 46,XY,inv(4)(p15q21) [4]/46,XY [5]                                                                              | Died            | 1.7              |
| Patient 22 | M   | 70  | AML-MRC                  | yes       | no         | No                     | 10.0%          | 47,XX,+8[12]/46,XX[8]                                                                                           | Died            | 42.6             |
| Patient 23 | M   | 65  | AML-MRC                  | yes       | no         | No                     | 4.8%           | 46,XX[20]                                                                                                       | Died            | 22.1             |
| Patient 24 | F   | 66  | AML NOS                  | yes       | yes        | Lymph Node             | 13.2%          | 46,XY[20]                                                                                                       | Died            | 10.2             |
| Patient 25 | F   | 77  | AML-MRC                  | no        | no         | No                     | 2.1%           | 46,XY[20]                                                                                                       | Alive           | 17.9             |
| Patient 26 | M   | 63  | AML-MRC                  | yes       | yes        | Leukemia cutis         |                | 46,XY[15]                                                                                                       | Alive           | 11.0             |
| Patient 27 | M   | 71  | AML NOS                  | no        | no         | No                     | 6.3%           | 46,XY[20]                                                                                                       | Died            | 21.0             |
| Patient 28 | M   | 58  | AML NOS                  | no        | no         | No                     | 26.3%          | 46,XY,+X,-7[16]/46,XY[4]                                                                                        | Died            | 3.8              |
| Patient 29 | M   | 56  | AML MRC                  | no        | no         | Lymph Node             | 3.5%           | 46,XY,del(9)(q22q32)[6]/46,idem,t(18;19)(q21;p13.3)[1]/46,idem,del(1)(q32)[1]/46,XY,del(9)(q12q34)[1]/46,XY[11] | Alive           | 5.6              |
| Patient 30 | M   | 65  | AML MRC                  | yes       | no         | No                     | 5.9%           | 46,XY,del(9)(q22q32)[6]/46,idem,t(18;19)(q21;p13.3)[1]/46,idem,del(1)(q32)[1]/46,XY,del(9)(q12q34)[1]/46,XY[11] | Alive           | 16.6             |
| Patient 31 | F   | 68  | AML NOS                  | no        | no         | No                     | 4.6%           | karyotype failure                                                                                               | Died            | 30.8             |
| Patient 32 | M   | 54  | t-AML                    | no        | no         | No                     | 3.0%           | 45,XY,-7[14]                                                                                                    | Died            | 14.1             |
| Patient 33 | M   | 15  | AML MRC                  | yes       | no         | No                     | 7.7%           | 46,XY,dup(1)(q22q42)[8]/46,idem,add(6)(p23)[6]                                                                  | Died            | 46.3             |
| Patient 34 | M   | 76  | AML MRC                  | yes       | no         | No                     | 2.2%           | 46,XY[14] use this was<br>46,XY,+1,der(1;7)(q10;p10)[8/12]                                                      | Died            | 51.8             |
| Patient 35 | M   | 78  | AML MRC                  | yes       | no         | No                     | 2.5%           | 46,XY[20]                                                                                                       | Died            | 7.3              |
| Patient 36 | M   | 9   | AML MRC                  | no        | no         | No                     | 2.9%           | 45,XY,-7 [20]                                                                                                   | Died            | 96.6             |
| Patient 37 | M   | 59  | t-AML                    | no        | no         | No                     | 3.3%           | 46,XY[20]                                                                                                       | Alive           | 22.6             |

|            |   |    |            |    |    |    |      |                                  |       |      |
|------------|---|----|------------|----|----|----|------|----------------------------------|-------|------|
| Patient 38 | M | 45 | AML NOS    | no | no | No | 2.2% | 46,XY[20]                        | Alive | 43.6 |
| Patient 39 | F | 76 | AML NOS    | no | no | No | 9.2% | 46,XX[20]                        | Died  | 13.0 |
| Patient 40 | F | 65 | AML NOS    | no | no | No | 2.5% | 46,XX[20]                        | Died  | 14.6 |
| Patient 41 | M | 29 | AML NOS    | no | no | No | 4.4% | 46,XY,?del(12)(p12)[3]/46,XY[22] | Alive | 51.0 |
| Patient 42 | F | 31 | AML w NPM1 | no | no | No | 2.8% | 46,XY[20]                        | Alive | 13.3 |

Patients 1-26 were pDC-AML at diagnosis. Patients 27-42 were pDC-AML late (after diagnosis).

Supplemental Table 5. Mutational annotation of pDC-AML

| PT# | Ploatform | Tm  | chr | start pos | Gene   | TxID         | cDNA_annotation                  | AA_annotation | VAF    | Annotation       |
|-----|-----------|-----|-----|-----------|--------|--------------|----------------------------------|---------------|--------|------------------|
| 1   | RD        | D   | 20  | 31022615  | ASXL1  | NM_015338    | c.2101delC                       | p.P701fs      | 18.80% | Likely ONCOGENIC |
| 1   | RD        | D   | X   | 133551212 | PHF6   | NM_032458    | c.848G>T                         | p.C283F       | 31.70% | Likely ONCOGENIC |
| 1   | RD        | D   | 21  | 36259172  | RUNX1  | NM_001754    | c.319C>T                         | p.R107C       | 14.40% | Likely ONCOGENIC |
| 1   | RD        | D   | X   | 133551305 | PHF6   | NM_032458    | c.941T>C                         | p.I314T       | 15.00% | Likely ONCOGENIC |
| 1   | RD        | D   | 4   | 106157989 | TET2   | NM_001127208 | c.2890C>T                        | p.Q964X       | 18.40% | Likely ONCOGENIC |
| 1   | RD        | F#1 | 20  | 31022615  | ASXL1  | NM_015338    | c.2101delC                       | p.P701fs      | 41.50% | Likely ONCOGENIC |
| 1   | RD        | F#1 | X   | 133551212 | PHF6   | NM_032458    | c.848G>T                         | p.C283F       | 70.40% | Likely ONCOGENIC |
| 1   | RD        | F#1 | 21  | 36259172  | RUNX1  | NM_001754    | c.319C>T                         | p.R107C       | 32.90% | Likely ONCOGENIC |
| 1   | RD        | F#1 | 12  | 111856098 | SH2B3  | NM_005475    | c.149G>A                         | p.R50Q        | 6.10%  | UNKNOWN          |
| 1   | RD        | F#1 | 4   | 106157989 | TET2   | NM_001127208 | c.2890C>T                        | p.Q964X       | 32.80% | Likely ONCOGENIC |
| 2   | RD        | D   | 2   | 209113112 | IDH1   | NM_005896    | c.395G>A                         | p.R132H       | 13.80% | ONCOGENIC        |
| 2   | RD        | D   | 21  | 36171683  | RUNX1  | NM_001754    | c.881delC                        | p.P294fs      | 75.20% | Likely ONCOGENIC |
| 3   | RD        | D   | 21  | 36231864  | RUNX1  | NM_001754    | c.520A>C                         | p.T174P       | 36.90% | Likely ONCOGENIC |
| 4   | IMPACT    | D   | 21  | 36164571  | RUNX1  | NM_001754    | c.1303dupG                       | p.A435Gfs*165 | 6.50%  | Likely ONCOGENIC |
| 5   | RD        | D   | 20  | 31022989  | ASXL1  | NM_015338    | c.2475_2476delAG                 | p.G826Nfs*6   | 24.73% | Likely ONCOGENIC |
| 6   | IMPACT    | D   | 21  | 36259198  | RUNX1  | NM_001754    | c.292delC                        | p.L98Sfs*24   | 53.80% | Likely ONCOGENIC |
| 6   | IMPACT    | D   | 2   | 25467449  | DNMT3A | NM_022552    | c.1627G>T                        | p.G543C       | 42.70% | Likely ONCOGENIC |
| 6   | IMPACT    | D   | 2   | 25463539  | DNMT3A | NM_022552    | c.2142_2143insGGTCA<br>AACAAGCCC | p.I715Gfs*69  | 19.70% | Likely ONCOGENIC |
| 7   | RD        | D   | 21  | 36259138  | RUNX1  | NM_001754    | c.351+2T>C                       | Splicing      | 42.62% | Likely ONCOGENIC |
| 7   | RD        | D   | 21  | 36259186  | RUNX1  | NM_001754    | c.305T>C                         | p.L102P       | 10.31% | Likely ONCOGENIC |
| 7   | RD        | D   | 17  | 30274671  | SUZ12  | NM_015355    | c.422T>C                         | p.V141A       | 55.05% | UNKNOWN          |
| 8   | IMPACT    | D   | 1   | 115258747 | NRAS   | NM_002524    | c.35G>C                          | p.G12A        | 2.40%  | ONCOGENIC        |
| 8   | IMPACT    | D   | 21  | 36164685  | RUNX1  | NM_001754    | c.1189delC                       | p.Q397Kfs*197 | 22.70% | Likely ONCOGENIC |
| 8   | IMPACT    | D   | 17  | 74732959  | SRSF2  | NM_003016    | c.284C>T                         | p.P95L        | 6.20%  | ONCOGENIC        |
| 8   | IMPACT    | D   | 12  | 112888199 | PTPN11 | NM_002834    | c.215C>G                         | p.A72G        | 16.70% | Likely ONCOGENIC |
| 9   | IMPACT    | D   | 2   | 25966453  | ASXL2  | NM_015338    | c.2752_2753delinsGGT             | p.S918Gfs*8   | 17.00% | Likely ONCOGENIC |
| 9   | IMPACT    | D   | X   | 133511704 | PHF6   | NM_032458    | c.59_70delinsTT                  | p.C20Ffs*10   | 33.40% | Likely ONCOGENIC |
| 10  | RD        | D   | 2   | 198267371 | SF3B1  | NM_012433    | c.1986C>A                        | p.H662Q       | 16.10% | ONCOGENIC        |

|    |    |     |    |               |        |                  |                                                |                            |        |                  |
|----|----|-----|----|---------------|--------|------------------|------------------------------------------------|----------------------------|--------|------------------|
| 10 | RD | D   | 7  | 14851435<br>4 | EZH2   | NM_004456        | c.1370G>A                                      | p.C457Y                    | 38.30% | UNKNOWN          |
| 10 | RD | D   | 20 | 31023408      | ASXL1  | NM_015338        | c.2893C>T                                      | p.R965*                    | 18.90% | ONCOGENIC        |
| 10 | RD | D   | 21 | 36231783      | RUNX1  | NM_001754        | c.601C>T                                       | p.R201*                    | 18.30% | ONCOGENIC        |
| 10 | RD | F#1 | 2  | 198267371     | SF3B1  | NM_012433        | c.1986C>A                                      | p.H662Q                    | 10.95% | ONCOGENIC        |
| 10 | RD | F#1 | 7  | 14851435<br>4 | EZH2   | NM_004456        | c.1370G>A                                      | p.C457Y                    | 7.60%  | UNKNOWN          |
| 10 | RD | F#1 | 20 | 31023408      | ASXL1  | NM_015338        | c.2893C>T                                      | p.R965*                    | 1.00%  | ONCOGENIC        |
| 10 | RD | F#1 | 9  | 5073770       | JAK2   | NM_004972        | c.G1849T                                       | p.V617F                    | 0.10%  | ONCOGENIC        |
| 10 | RD | F#2 | 2  | 198267371     | SF3B1  | NM_012433        | c.1986C>A                                      | p.H662Q                    | 25.37% | ONCOGENIC        |
| 10 | RD | F#2 | 7  | 14851435<br>4 | EZH2   | NM_004456        | c.1370G>A                                      | p.C457Y                    | 44.25% | UNKNOWN          |
| 10 | RD | F#2 | 20 | 31023408      | ASXL1  | NM_015338        | c.2893C>T                                      | p.R965*                    | 18.04% | ONCOGENIC        |
| 10 | RD | F#2 | 21 | 36231783      | RUNX1  | NM_001754        | c.601C>T                                       | p.R201*                    | 7.67%  | ONCOGENIC        |
| 10 | RD | F#3 | 2  | 198267371     | SF3B1  | NM_012433        | c.1986C>A                                      | p.H662Q                    | 38.70% | ONCOGENIC        |
| 10 | RD | F#3 | 7  | 14851435<br>4 | EZH2   | NM_004456        | c.1370G>A                                      | p.C457Y                    | 70.51% | UNKNOWN          |
| 10 | RD | F#3 | 20 | 31023408      | ASXL1  | NM_015338        | c.2893C>T                                      | p.R965*                    | 26.94% | ONCOGENIC        |
| 10 | RD | F#3 | 21 | 36231783      | RUNX1  | NM_001754        | c.601C>T                                       | p.R201*                    | 37.43% | ONCOGENIC        |
| 10 | RD | F#3 | 21 | 36259152      | RUNX1  | NM_001754        | c.338_339insGCAG                               | p.I114Qfs*25               | 15.35% | Likely ONCOGENIC |
| 10 | RD | F#4 | 2  | 198267371     | SF3B1  | NM_012433        | c.1986C>A                                      | p.H662Q                    | 50.15% | ONCOGENIC        |
| 10 | RD | F#4 | 7  | 14851435<br>4 | EZH2   | NM_004456        | c.1370G>A                                      | p.C457Y                    | 92.35% | UNKNOWN          |
| 10 | RD | F#4 | 13 | 28608260      | FLT3   | NM_004119        | c.1795_1796insCCCTTG<br>ATTTCAGAGAATATGA<br>AT | p.E598_Y599insSLD<br>FREYE | 3.10%  | ONCOGENIC        |
| 10 | RD | F#4 | 20 | 31023408      | ASXL1  | NM_015338        | c.2893C>T                                      | p.R965*                    | 62.16% | ONCOGENIC        |
| 10 | RD | F#4 | 21 | 36231783      | RUNX1  | NM_001754        | c.601C>T                                       | p.R201*                    | 68.92% | ONCOGENIC        |
| 10 | RD | F#4 | 21 | 36259152      | RUNX1  | NM_001754        | c.338_339insGCAG                               | p.I114Qfs*25               | 48.17% | Likely ONCOGENIC |
| 11 | RD | D   | 7  | 14854435<br>3 | EZH2   | NM_004456        | c.26_36delinsG                                 | p.E9Gfs*8                  | 24.79% | UNKNOWN          |
| 11 | RD | D   | 7  | 14850872<br>1 | EZH2   | NM_004456        | c.1943G>C                                      | p.G648A                    | 6.56%  | UNKNOWN          |
| 11 | RD | D   | 9  | 13939923<br>7 | NOTCH1 | NM_017617        | c.4906G>A                                      | p.E1636K                   | 66.46% | UNKNOWN          |
| 11 | RD | D   | 20 | 31022497      | ASXL1  | NM_015338        | c.1982_1990delinsCTC<br>T                      | p.R661Tfs*5                | 25.63% | Likely ONCOGENIC |
| 11 | RD | D   | X  | 123211892     | STAG2  | NM_001042<br>749 | c.2759_2760insAA                               | p.L921Ifs*11               | 26.49% | Likely ONCOGENIC |
| 11 | RD | F#1 | 7  | 14854435<br>3 | EZH2   | NM_004456        | c.26_36delinsG                                 | p.E9Gfs*8                  | 42.16% | UNKNOWN          |
| 11 | RD | F#1 | 7  | 14850872      | EZH2   | NM_004456        | c.1943G>C                                      | p.G648A                    | 31.14% | UNKNOWN          |

| 1  |        |     |    |           |        |              |                                              |               |        |                  |
|----|--------|-----|----|-----------|--------|--------------|----------------------------------------------|---------------|--------|------------------|
| 11 | RD     | F#1 | 9  | 139399237 | NOTCH1 | NM_017617    | c.4906G>A                                    | p.E1636K      | 66.01% | UNKNOWN          |
| 11 | RD     | F#1 | 20 | 31022497  | ASXL1  | NM_015338    | c.1982_1990delinsCTC<br>T                    | p.R661Tfs*5   | 41.13% | Likely ONCOGENIC |
| 11 | RD     | F#1 | X  | 123211892 | STAG2  | NM_001042749 | c.2759_2760insAA                             | p.L921Ifs*11  | 41.95% | Likely ONCOGENIC |
| 12 | IMPACT | D   | 21 | 36171718  | RUNX1  | NM_001754    | c.847C>T                                     | p.Q283*       | 76.00% | Likely ONCOGENIC |
| 12 | IMPACT | D   | 13 | 28592642  | FLT3   | NM_004119    | c.2503G>T                                    | p.D835Y       | 54.10% | ONCOGENIC        |
| 12 | IMPACT | D   | 4  | 106158000 | TET2   | NM_001127208 | c.2905delC                                   | p.Q969Kfs*38  | 42.90% | Likely ONCOGENIC |
| 12 | IMPACT | D   | 17 | 74732959  | SRSF2  | NM_003016    | c.284C>A                                     | p.P95H        | 46.80% | ONCOGENIC        |
| 12 | IMPACT | D   | 17 | 7577099   | TP53   | NM_000546    | c.839G>C                                     | p.R280T       | 3.50%  | ONCOGENIC        |
| 12 | IMPACT | D   | 1  | 115256529 | NRAS   | NM_002524    | c.182A>G                                     | p.Q61R        | 38.50% | ONCOGENIC        |
| 12 | IMPACT | D   | X  | 39932146  | BCOR   | NM_001123385 | c.2452_2453insGTCTC<br>CTG                   | p.D818Gfs*41  | 70.80% | Likely ONCOGENIC |
| 12 | IMPACT | D   | 18 | 42531913  | SETBP1 | NM_015559    | c.2608G>A                                    | p.G870S       | 4.70%  | ONCOGENIC        |
| 12 | IMPACT | D   | 2  | 198267371 | SF3B1  | NM_012433    | c.1986C>A                                    | p.H662Q       | 47.70% | Likely ONCOGENIC |
| 12 | IMPACT | D   | 20 | 31022468  | ASXL1  | NM_015338    | c.1955dupG                                   | p.G653Rfs*5   | 40.00% | Likely ONCOGENIC |
| 13 | RD     | D   | 17 | 74732935  | SRSF2  | NM_003016    | c.284_307delCCCCGG<br>ACTCACACCACAGCCG<br>CC | p.P95_R102del | 39.48% | ONCOGENIC        |
| 13 | RD     | D   | X  | 39922106  | BCOR   | NM_001123385 | c.4066A>T                                    | p.K1356*      | 65.99% | ONCOGENIC        |
| 13 | RD     | D   | 21 | 36252878  | RUNX1  | NM_001754    | c.484A>G                                     | p.R162G       | 58.40% | Likely ONCOGENIC |
| 14 | RD     | D   | 1  | 115258747 | NRAS   | NM_002524    | c.35G>A                                      | p.G12D        | 36.40% | ONCOGENIC        |
| 14 | RD     | D   | 21 | 36231791  | RUNX1  | NM_001754    | c.593A>G                                     | p.D198G       | 44.40% | Likely ONCOGENIC |
| 15 | RD     | D   | 2  | 25464525  | DNMT3A | NM_022552    | c.1988C>T                                    | p.S663L       | 11.00% | UNKNOWN          |
| 15 | RD     | D   | 21 | 44524456  | U2AF1  | NM_006758    | c.101C>T                                     | p.S34F        | 37.00% | ONCOGENIC        |
| 15 | RD     | D   | 21 | 36259175  | RUNX1  | NM_001754    | c.314_315delAC                               | p.H105Lfs*32  | 26.50% | Likely ONCOGENIC |
| 16 | IMPACT | D   | X  | 133551305 | PHF6   | NM_032458    | c.941T>C                                     | p.I314T       | 26.19% | Likely ONCOGENIC |
| 16 | IMPACT | D   | 13 | 28608320  | FLT3   | NM_004119    | c.1736T>A                                    | p.V579E       | 18.84% | Likely ONCOGENIC |
| 16 | IMPACT | D   | 21 | 36252994  | RUNX1  | NM_001754    | c.366_367dupGG                               | p.D123Gfs*11  | 44.85% | Likely ONCOGENIC |
| 16 | IMPACT | D   | X  | 133551305 | PHF6   | NM_032458    | c.941T>C                                     | p.I314T       | 63.88% | Likely ONCOGENIC |
| 17 | RD     | D   | 20 | 31022547  | ASXL1  | NM_015338    | c.2036delG                                   | p.G679Efs*24  | 12.68% | Likely ONCOGENIC |
| 17 | RD     | D   | 21 | 36259198  | RUNX1  | NM_001754    | c.292delC                                    | p.L98Sfs*24   | 5.41%  | Likely ONCOGENIC |
| 17 | RD     | F#1 | 20 | 31022547  | ASXL1  | NM_015338    | c.2036delG                                   | p.G679Efs*24  | 28.29% | Likely ONCOGENIC |

|    |        |     |    |               |       |                  |                                               |               |        |                  |
|----|--------|-----|----|---------------|-------|------------------|-----------------------------------------------|---------------|--------|------------------|
| 17 | RD     | F#1 | 21 | 36259198      | RUNX1 | NM_001754        | c.292delC                                     | p.L98Sfs*24   | 25.53% | Likely ONCOGENIC |
| 17 | RD     | F#1 | 21 | 36252865      | RUNX1 | NM_001754        | c.497G>T                                      | p.R166L       | 7.11%  | LIKELY ONCOGENIC |
| 17 | RD     | F#1 | 21 | 36252877      | RUNX1 | NM_001754        | c.485G>A                                      | p.R162K       | 10.48% | Likely ONCOGENIC |
| 17 | RD     | F#1 | X  | 44938515      | KDM6A | NM_021140        | c.3063G>A                                     | p.W1021*      | 31.87% | UNKNOWN          |
| 17 | RD     | F#1 | 4  | 10615604<br>2 | TET2  | NM_001127<br>208 | c.945delC                                     | p.Q317Rfs*30  | 11.50% | Likely ONCOGENIC |
| 17 | RD     | F#1 | 4  | 10616486<br>6 | TET2  | NM_001127<br>208 | c.3734A>G                                     | p.Y1245C      | 12.25% | Likely ONCOGENIC |
| 17 | RD     | F#1 | 21 | 36206762      | RUNX1 | NM_001754        | c.749_750insGTTGACC<br>C                      | p.A251Lfs*6   | 58.92% | Likely ONCOGENIC |
| 17 | RD     | F#1 | X  | 39931909      | BCOR  | NM_001123<br>385 | c.2690C>A                                     | p.S897*       | 69.72% | ONCOGENIC        |
| 18 | IMPACT | D   | 1  | 115258674     | NRAS  | NM_002524        | c.108A>G                                      | p.I36M        | 46.60% | UNKNOWN          |
| 18 | IMPACT | D   | 20 | 31022441      | ASXL1 | NM_015338        | c.1934dupG                                    | p.G646Wfs*12  | 35.10% | ONCOGENIC        |
| 18 | IMPACT | D   | 21 | 36171751      | RUNX1 | NM_001754        | c.814C>T                                      | p.Q272*       | 34.90% | Likely ONCOGENIC |
| 18 | IMPACT | D   | X  | 39922119      | BCOR  | NM_001123<br>385 | c.4051_4052delAC                              | p.T1351Rfs*57 | 86.40% | Likely ONCOGENIC |
| 18 | IMPACT | D   | X  | 13355926<br>5 | PHF6  | NM_032458        | c.1003A>T                                     | p.R335*       | 91.60% | ONCOGENIC        |
| 18 | IMPACT | D   | X  | 39922124      | BCOR  | NM_001123<br>385 | c.4048T>A                                     | p.Y1350N      | 87.90% | UNKNOWN          |
| 19 | IMPACT | D   | 12 | 49428194      | KMT2D | NM_003482        | c.10505_10506insTTTA<br>CCC                   | p.N3503Lfs*4  | 7.62%  | Likely ONCOGENIC |
| 19 | IMPACT | D   | 2  | 19826770<br>5 | SF3B1 | NM_012433        | c.1774G>A                                     | p.E592K       | 18.93% | UNKNOWN          |
| 19 | IMPACT | D   | 20 | 31022402      | ASXL1 | NM_015338        | c.1900_1922delAGAGA<br>GGCGGCCACCACTGCC<br>AT | p.E635Rfs*15  | 19.79% | Likely ONCOGENIC |
| 19 | IMPACT | D   | 21 | 36252865      | RUNX1 | NM_001754        | c.497G>A                                      | p.R166Q       | 17.55% | LIKELY ONCOGENIC |
| 19 | IMPACT | D   | 4  | 10619086<br>0 | TET2  | NM_001127<br>208 | c.4138C>T                                     | p.H1380Y      | 17.10% | Likely ONCOGENIC |
| 19 | IMPACT | D   | 8  | 11787408<br>2 | RAD21 | NM_006265        | c.371_372insTGAGGGC<br>GGA                    | p.L124Ffs*6   | 5.66%  | UNKNOWN          |
| 19 | IMPACT | D   | X  | 13354794<br>0 | PHF6  | NM_032458        | c.673C>T                                      | p.R225*       | 20.24% | ONCOGENIC        |
| 20 | IMPACT | D   | 1  | 115258747     | NRAS  | NM_002524        | c.35G>T                                       | p.G12V        | 13.40% | ONCOGENIC        |
| 20 | IMPACT | D   | 12 | 25398285      | KRAS  | NM_033360        | c.34G>C                                       | p.G12R        | 2.40%  | ONCOGENIC        |
| 20 | IMPACT | D   | 4  | 106193931     | TET2  | NM_001127<br>208 | c.4393C>T                                     | p.R1465*      | 16.00% | Likely ONCOGENIC |
| 20 | IMPACT | D   | 4  | 10615732<br>6 | TET2  | NM_001127<br>208 | c.2227C>T                                     | p.Q743*       | 52.90% | Likely ONCOGENIC |
| 20 | IMPACT | D   | 11 | 119148919     | CBL   | NM_005188        | c.1139T>C                                     | p.L380P       | 21.50% | Likely ONCOGENIC |
| 20 | IMPACT | D   | 17 | 74732959      | SRSF2 | NM_003016        | c.284C>T                                      | p.P95L        | 34.00% | Likely ONCOGENIC |
| 21 | OSH    | D   | 1  | 115258747     | NRAS  | NM_002524        | c.35G>T                                       | p.G12V        | 37.00% | ONCOGENIC        |

|    |        |     |    |               |            |           |                                             |               |        |                  |
|----|--------|-----|----|---------------|------------|-----------|---------------------------------------------|---------------|--------|------------------|
| 21 | OSH    | D   | 21 | 36171607      | RUNX1      | NM_001754 | c.958C>T                                    | p.R320*       | 17.00% | Likely ONCOGENIC |
| 21 | OSH    | D   | 21 | 36259172      | RUNX1      | NM_001754 | c.319C>T                                    | p.R107C       | 16.50% | Likely ONCOGENIC |
| 21 | OSH    | D   | 17 | 74732959      | SRSF2      | NM_003016 | c.284C>A                                    | p.P95H        | 42.00% | ONCOGENIC        |
| 21 | OSH    | D   | 20 | 31022402      | ASXL1      | NM_015338 | c.1900_1922delAGAGA<br>GGCGGCCCACTGCC<br>AT | p.E635fs*15   | 26.00% | Likely ONCOGENIC |
| 22 | RD     | D   | 2  | 19826735<br>9 | SF3B1      | NM_012433 | c.1998G>T                                   | p.K666N       | 46.90% | Likely ONCOGENIC |
| 22 | RD     | D   | 21 | 36231774      | RUNX1      | NM_001754 | c.610C>T                                    | p.R204*       | 50.00% | Likely ONCOGENIC |
| 22 | RD     | D   | 13 | 28592642      | FLT3       | NM_004119 | c.2503G>T                                   | p.D835Y       | 2.10%  | ONCOGENIC        |
| 22 | RD     | D   | 2  | 25469964      | DNMT3<br>A | NM_022552 | c.1078A>G                                   | p.N360D       | 10.00% | UNKNOWN          |
| 23 | IMPACT | D   | 21 | 36231782      | RUNX1      | NM_001754 | c.602G>A                                    | p.R201Q       | 14.40% | ONCOGENIC        |
| 23 | IMPACT | D   | 2  | 25464537      | DNMT3<br>A | NM_022552 | c.1976G>A                                   | p.R659H       | 31.80% | Likely ONCOGENIC |
| 23 | IMPACT | D   | 2  | 25468159      | DNMT3<br>A | NM_022552 | c.1513_1516delGAAC                          | p.E505Tfs*145 | 19.50% | Likely ONCOGENIC |
| 23 | IMPACT | D   | 21 | 44514777      | U2AF1      | NM_006758 | c.470A>G                                    | p.Q157R       | 13.60% | ONCOGENIC        |
| 23 | IMPACT | D   | 14 | 81558933      | TSHR       | NM_000369 | c.526T>C                                    | p.C176R       | 14.50% | UNKNOWN          |
| 23 | IMPACT | D   | 17 | 74732959      | SRSF2      | NM_003016 | c.284C>A                                    | p.P95H        | 15.30% | ONCOGENIC        |
| 24 | RD     | D   | 2  | 25457243      | DNMT3<br>A | NM_022552 | c.C2644T                                    | p.R882C       | 36.40% | ONCOGENIC        |
| 24 | RD     | D   | 15 | 90631934      | IDH2       | NM_002168 | c.G419A                                     | p.R140Q       | 34.80% | ONCOGENIC        |
| 24 | RD     | D   | 21 | 36171710      | RUNX1      | NM_001754 | c.855C>G                                    | p.Y285X       | 28.70% | ONCOGENIC        |
| 24 | RD     | F#1 | 2  | 25457243      | DNMT3<br>A | NM_022552 | c.C2644T                                    | p.R882C       | 23.70% | ONCOGENIC        |
| 24 | RD     | F#1 | 15 | 90631934      | IDH2       | NM_002168 | c.G419A                                     | p.R140Q       | 33.80% | ONCOGENIC        |
| 24 | RD     | F#1 | 21 | 36171710      | RUNX1      | NM_001754 | c.855C>G                                    | p.Y285X       | 16.70% | ONCOGENIC        |
| 24 | RD     | F#1 | 21 | 36252954      | RUNX1      | NM_001754 | c.408T>G                                    | p.N136K       | 33.20% | Likely ONCOGENIC |
| 24 | RD     | F#2 | 2  | 25457243      | DNMT3<br>A | NM_022552 | c.C2644T                                    | p.R882C       | 41.80% | ONCOGENIC        |
| 24 | RD     | F#2 | 15 | 90631934      | IDH2       | NM_002168 | c.G419A                                     | p.R140Q       | 43.60% | ONCOGENIC        |
| 24 | RD     | F#2 | 21 | 36171710      | RUNX1      | NM_001754 | c.C855G                                     | p.Y285X       | 25.20% | ONCOGENIC        |
| 24 | RD     | F#2 | 21 | 36252954      | RUNX1      | NM_001754 | c.408T>G                                    | p.N136K       | 44.90% | Likely ONCOGENIC |
| 24 | RD     | F#3 | 2  | 25457243      | DNMT3<br>A | NM_022552 | c.C2644T                                    | p.R882C       | 46.80% | ONCOGENIC        |
| 24 | RD     | F#3 | 15 | 90631934      | IDH2       | NM_002168 | c.G419A                                     | p.R140Q       | 47.40% | ONCOGENIC        |
| 24 | RD     | F#3 | 21 | 36171710      | RUNX1      | NM_001754 | c.855C>G                                    | p.Y285X       | 24.50% | ONCOGENIC        |
| 24 | RD     | F#3 | 21 | 36252954      | RUNX1      | NM_001754 | c.408T>G                                    | p.N136K       | 48.10% | Likely ONCOGENIC |

|    |    |     |    |           |            |           |                |              |        |                  |
|----|----|-----|----|-----------|------------|-----------|----------------|--------------|--------|------------------|
| 24 | RD | F#4 | 2  | 25457243  | DNMT3<br>A | NM_022552 | c.C2644T       | p.R882C      | 17.60% | ONCOGENIC        |
| 24 | RD | F#4 | 15 | 90631934  | IDH2       | NM_002168 | c.G419A        | p.R140Q      | 22.20% | ONCOGENIC        |
| 24 | RD | F#4 | 21 | 36171710  | RUNX1      | NM_001754 | c.855C>G       | p.Y285X      | 7.00%  | ONCOGENIC        |
| 24 | RD | F#4 | 21 | 36252954  | RUNX1      | NM_001754 | c.408T>G       | p.N136K      | 13.80% | Likely ONCOGENIC |
| 24 | RD | F#5 | 2  | 25457243  | DNMT3<br>A | NM_022552 | c.C2644T       | p.R882C      | 46.01% | ONCOGENIC        |
| 24 | RD | F#5 | 15 | 90631934  | IDH2       | NM_002168 | c.G419A        | p.R140Q      | 47.45% | ONCOGENIC        |
| 24 | RD | F#5 | 21 | 36252954  | RUNX1      | NM_001754 | c.408T>G       | p.N136K      | 41.02% | Likely ONCOGENIC |
| 25 | RD | D   | 2  | 209113113 | IDH1       | NM_005896 | c.394C>T       | p.R132C      | 41.41% | ONCOGENIC        |
| 25 | RD | D   | 2  | 25457242  | DNMT3<br>A | NM_022552 | c.2645G>A      | p.R882H      | 41.72% | Likely ONCOGENIC |
| 25 | RD | D   | 2  | 25464516  | DNMT3<br>A | NM_022552 | c.1997G>A      | p.C666Y      | 40.78% | UNKNOWN          |
| 25 | RD | D   | 11 | 32456486  | WT1        | NM_024426 | c.406C>T       | p.P136S      | 27.75% | UNKNOWN          |
| 25 | RD | D   | 11 | 32456248  | WT1        | NM_024426 | c.643_644insCG | p.Q215fs     | 34.95% | UNKNOWN          |
| 25 | RD | D   | 13 | 28592642  | FLT3       | NM_004119 | c.2503G>C      | p.D835H      | 38.39% | ONCOGENIC        |
| 25 | RD | D   | 19 | 33792937  | CEBPA      | NM_004364 | c.383dupC      | p.P129fs     | 29.58% | Likely ONCOGENIC |
| 25 | RD | D   | 21 | 36252994  | RUNX1      | NM_001754 | c.366_367dupGG | p.D123Gfs*11 | 26.06% | Likely ONCOGENIC |
| 25 | RD | F#1 | 2  | 209113113 | IDH1       | NM_005896 | c.394C>T       | p.R132C      | 18.99% | ONCOGENIC        |
| 25 | RD | F#1 | 2  | 25457242  | DNMT3<br>A | NM_022552 | c.2645G>A      | p.R882H      | 26.53% | Likely ONCOGENIC |
| 25 | RD | F#1 | 2  | 25464516  | DNMT3<br>A | NM_022552 | c.1997G>A      | p.C666Y      | 27.08% | UNKNOWN          |
| 25 | RD | F#1 | 11 | 32456486  | WT1        | NM_024426 | c.406C>T       | p.P136S      | 33.60% | UNKNOWN          |
| 25 | RD | F#1 | 11 | 32456248  | WT1        | NM_024426 | c.643_644insCG | p.Q215fs     | 12.85% | UNKNOWN          |
| 25 | RD | F#1 | 13 | 28592642  | FLT3       | NM_004119 | c.2503G>C      | p.D835H      | 11.95% | ONCOGENIC        |
| 25 | RD | F#1 | 19 | 33792937  | CEBPA      | NM_004364 | c.383dupC      | p.P129fs     | 9.72%  | Likely ONCOGENIC |
| 25 | RD | F#1 | 21 | 36252994  | RUNX1      | NM_001754 | c.366_367dupGG | p.D123Gfs*11 | 10.12% | Likely ONCOGENIC |
| 25 | RD | F#2 | 2  | 209113113 | IDH1       | NM_005896 | c.394C>T       | p.R132C      | 44.85% | ONCOGENIC        |
| 25 | RD | F#2 | 2  | 25457242  | DNMT3<br>A | NM_022552 | c.2645G>A      | p.R882H      | 37.30% | Likely ONCOGENIC |
| 25 | RD | F#2 | 2  | 25464516  | DNMT3<br>A | NM_022552 | c.1997G>A      | p.C666Y      | 51.25% | UNKNOWN          |
| 25 | RD | F#2 | 11 | 32456486  | WT1        | NM_024426 | c.406C>T       | p.P136S      | 46.80% | UNKNOWN          |
| 25 | RD | F#2 | 11 | 32456248  | WT1        | NM_024426 | c.643_644insCG | p.Q215fs     | 41.55% | UNKNOWN          |
| 25 | RD | F#2 | 13 | 28592642  | FLT3       | NM_004119 | c.2503G>C      | p.D835H      | 37.46% | ONCOGENIC        |
| 25 | RD | F#2 | 19 | 33792937  | CEBPA      | NM_004364 | c.383dupC      | p.P129fs     | 46.26% | Likely ONCOGENIC |



|    |    |     |    |               |            |                  |                |               |        |                  |
|----|----|-----|----|---------------|------------|------------------|----------------|---------------|--------|------------------|
| 25 | RD | F#2 | 21 | 36252994      | RUNX1      | NM_001754        | c.366_367dupGG | p.D123Gfs*11  | 36.74% | Likely ONCOGENIC |
| 25 | RD | F#3 | 2  | 209113113     | IDH1       | NM_005896        | c.394C>T       | p.R132C       | 43.29% | ONCOGENIC        |
| 25 | RD | F#3 | 2  | 25457242      | DNMT3<br>A | NM_022552        | c.2645G>A      | p.R882H       | 41.15% | Likely ONCOGENIC |
| 25 | RD | F#3 | 2  | 25464516      | DNMT3<br>A | NM_022552        | c.1997G>A      | p.C666Y       | 40.46% | UNKNOWN          |
| 25 | RD | F#3 | 11 | 32456486      | WT1        | NM_024426        | c.406C>T       | p.P136S       | 34.81% | UNKNOWN          |
| 25 | RD | F#3 | 11 | 32456248      | WT1        | NM_024426        | c.643_644insCG | p.Q215fs      | 38.68% | UNKNOWN          |
| 25 | RD | F#3 | 13 | 28592642      | FLT3       | NM_004119        | c.2503G>C      | p.D835H       | 37.28% | ONCOGENIC        |
| 25 | RD | F#3 | 19 | 33792937      | CEBPA      | NM_004364        | c.383dupC      | p.P129fs      | 27.99% | Likely ONCOGENIC |
| 25 | RD | F#3 | 21 | 36252994      | RUNX1      | NM_001754        | c.366_367dupGG | p.D123Gfs*11  | 29.87% | Likely ONCOGENIC |
| 25 | RD | F#4 | 2  | 209113113     | IDH1       | NM_005896        | c.394C>T       | p.R132C       | 44.88% | ONCOGENIC        |
| 25 | RD | F#4 | 2  | 25457242      | DNMT3<br>A | NM_022552        | c.2645G>A      | p.R882H       | 52.79% | Likely ONCOGENIC |
| 25 | RD | F#4 | 2  | 25464516      | DNMT3<br>A | NM_022552        | c.1997G>A      | p.C666Y       | 43.93% | UNKNOWN          |
| 25 | RD | F#4 | 11 | 32456486      | WT1        | NM_024426        | c.406C>T       | p.P136S       | 29.57% | UNKNOWN          |
| 25 | RD | F#4 | 11 | 32456248      | WT1        | NM_024426        | c.643_644insCG | p.Q215fs      | 47.15% | UNKNOWN          |
| 25 | RD | F#4 | 13 | 28592642      | FLT3       | NM_004119        | c.2503G>C      | p.D835H       | 46.57% | ONCOGENIC        |
| 25 | RD | F#4 | 19 | 33792937      | CEBPA      | NM_004364        | c.383dupC      | p.P129fs      | 44.76% | Likely ONCOGENIC |
| 25 | RD | F#4 | 21 | 36252994      | RUNX1      | NM_001754        | c.366_367dupGG | p.D123Gfs*11  | 32.76% | Likely ONCOGENIC |
| 26 | RD | F#1 | 21 | 36252865      | RUNX1      | NM_001754        | c.497G>A       | p.R166Q       | 41.20% | Likely ONCOGENIC |
| 27 | RD | F#1 | 2  | 209113113     | IDH1       | NM_005896        | c.394C>A       | p.R132S       | 29.37% | Likely ONCOGENIC |
| 27 | RD | F#1 | 2  | 25467408      | DNMT3<br>A | NM_022552        | c.1667+1G>A    | p.X556_splice | 89.10% | ONCOGENIC        |
| 27 | RD | F#1 | 17 | 7577091       | TP53       | NM_000546        | c.847C>T       | p.R283C       | 65.57% | ONCOGENIC        |
| 27 | RD | F#1 | 17 | 74732959      | SRSF2      | NM_003016        | c.284C>A       | p.P95H        | 43.85% | ONCOGENIC        |
| 27 | RD | F#1 | X  | 53430498      | SMC1A      | NM_006306        | c.2420G>A      | p.R807H       | 10.94% | UNKNOWN          |
| 28 | RD | F#1 | 1  | 11525874<br>8 | NRAS       | NM_002524        | c.34G>A        | p.G12S        | 6.32%  | ONCOGENIC        |
| 28 | RD | F#1 | 4  | 55599321      | KIT        | NM_000222        | c.2447A>T      | p.D816V       | 10.08% | ONCOGENIC        |
| 28 | RD | F#1 | 17 | 74732959      | SRSF2      | NM_003016        | c.284C>A       | p.P95H        | 47.38% | ONCOGENIC        |
| 29 | RD | F#1 | 21 | 36164485      | RUNX1      | NM_004364        | c.1390A>T      | p.T464S       | 9.50%  | UNKNOWN          |
| 30 | RD | F#1 | 4  | 10615636<br>4 | TET2       | NM_001127<br>208 | c.1270dupA     | p.S424Kfs*19  | 38.97% | Likely ONCOGENIC |
| 30 | RD | F#1 | 4  | 10618291<br>6 | TET2       | NM_001127<br>208 | c.3957delA     | p.E1320Rfs*43 | 44.09% | Likely ONCOGENIC |
| 30 | RD | F#1 | 17 | 74732959      | SRSF2      | NM_003016        | c.284C>A       | p.P95H        | 4.52%  | ONCOGENIC        |

|    |        |     |    |                |            |                  |                                  |               |        |                  |
|----|--------|-----|----|----------------|------------|------------------|----------------------------------|---------------|--------|------------------|
| 30 | RD     | F#1 | X  | 123197782      | STAG2      | NM_001042<br>749 | c.1907dupA                       | p.Y636*       | 5.80%  | Likely ONCOGENIC |
| 30 | RD     | F#1 | X  | 133511705      | PHF6       | NM_032458        | c.58T>A                          | p.C20S        | 89.86% | UNKNOWN          |
| 31 | RD     | F#1 | 21 | 44524456       | U2AF1      | NM_006758        | c.101C>T                         | p.S34F        | 12.34% | ONCOGENIC        |
| 31 | RD     | F#1 | 21 | 36252878       | RUNX1      | NM_001754        | c.484A>G                         | p.R162G       | 7.03%  | Likely ONCOGENIC |
| 31 | RD     | F#1 | 21 | 36231774       | RUNX1      | NM_001754        | c.593_609delATGGGC<br>CCCAGAACCT | p.D198Afs*9   | 6.21%  | ONCOGENIC        |
| 32 | RD     | F#1 | 17 | 7578404        | TP53       | NM_000546        | c.526T>G                         | p.C176G       | 2.15%  | ONCOGENIC        |
| 32 | RD     | F#1 | 17 | 7578406        | TP53       | NM_000546        | c.524G>A                         | p.R175H       | 4.28%  | ONCOGENIC        |
| 32 | RD     | F#1 | 17 | 74732959       | SRSF2      | NM_003016        | c.284C>T                         | p.P95L        | 12.02% | Likely ONCOGENIC |
| 32 | RD     | F#1 | 21 | 36231797       | RUNX1      | NM_001754        | c.587C>A                         | p.T196K       | 16.21% | Likely ONCOGENIC |
| 32 | RD     | F#1 | 18 | 42531907       | SETBP1     | NM_015559        | c.2602G>A                        | p.D868N       | 4.74%  | ONCOGENIC        |
| 33 | RD     | F#1 | 12 | 25398285       | KRAS       | NM_033360        | c.34G>A                          | p.G12S        | 9.41%  | ONCOGENIC        |
| 33 | RD     | F#1 | 21 | 36231782       | RUNX1      | NM_001754        | c.602G>A                         | p.R201Q       | 11.07% | ONCOGENIC        |
| 33 | RD     | F#1 | 12 | 11992079       | ETV6       | NM_001987        | c.169C>T                         | p.Q57*        | 6.22%  | UNKNOWN          |
| 33 | RD     | F#1 | 19 | 13054704       | CALR       | NM_004343        | c.1231G>A                        | p.G411S       | 44.64% | UNKNOWN          |
| 33 | RD     | F#1 | 2  | 25463286       | DNMT3<br>A | NM_022552        | c.2207G>A                        | p.R736H       | 8.04%  | Likely ONCOGENIC |
| 33 | RD     | F#1 | 20 | 31023691       | ASXL1      | NM_015338        | c.3178dupG                       | p.V1060Gfs*27 | 5.66%  | Likely ONCOGENIC |
| 33 | RD     | F#1 | 4  | 106164741      | TET2       | NM_001127<br>208 | c.3609C>G                        | p.S1203R      | 39.81% | UNKNOWN          |
| 33 | RD     | F#1 | 7  | 14854429<br>1  | EZH2       | NM_004456        | c.100C>T                         | p.R34*        | 23.27% | UNKNOWN          |
| 33 | RD     | F#1 | 7  | 14854365<br>9  | EZH2       | NM_004456        | c.149T>C                         | p.L50S        | 25.90% | UNKNOWN          |
| 34 | IMPACT | F#1 | 21 | 36231791       | RUNX1      | NM_001754        | c.593A>G                         | p.D198G       | 2.80%  | Likely ONCOGENIC |
| 34 | IMPACT | F#1 | 17 | 74732959       | SRSF2      | NM_003016        | c.284C>A                         | p.P95H        | 5.40%  | ONCOGENIC        |
| 34 | IMPACT | F#1 | 4  | 10619374<br>8  | TET2       | NM_001127<br>208 | c.4210C>T                        | p.R1404*      | 5.30%  | Likely ONCOGENIC |
| 34 | IMPACT | F#1 | 20 | 31022441       | ASXL1      | NM_015338        | c.1934dupG                       | p.G646Wfs*12  | 22.20% | Likely ONCOGENIC |
| 35 | IMPACT | F#1 | 21 | 36259325       | RUNX1      | NM_001754        | c.165delG                        | p.L56Cfs*16   | 2.00%  | Likely ONCOGENIC |
| 35 | IMPACT | F#1 | 4  | 10615819<br>8  | TET2       | NM_001127<br>208 | c.2482delT                       | p.C828Afs*13  | 43.40% | Likely ONCOGENIC |
| 35 | IMPACT | F#1 | 4  | 10615758<br>0  | TET2       | NM_001127<br>208 | c.3100delC                       | p.Q1034Sfs*21 | 3.00%  | Likely ONCOGENIC |
| 35 | IMPACT | F#1 | 4  | 187541413      | FAT1       | NM_005245        | c.6327C>G                        | p.D2109E      | 9.20%  | UNKNOWN          |
| 35 | IMPACT | F#1 | 1  | 1:4381843<br>1 | MPL        | NM_005373        | c.1896G>T                        | p.W632C       | 5.50%  | UNKNOWN          |
| 35 | IMPACT | F#1 | 12 | 11288818<br>9  | PTPN11     | NM_002834        | c.205G>A                         | p.E69K        | 12.30% | Likely ONCOGENIC |
| 35 | IMPACT | F#1 | 17 | 74732959       | SRSF2      | NM_003016        | c.284C>G                         | p.P95R        | 13.10% | Likely ONCOGENIC |

|           |        |     |    |           |        |           |                  |              |        |                  |
|-----------|--------|-----|----|-----------|--------|-----------|------------------|--------------|--------|------------------|
| <b>36</b> | IMPACT | F#1 | 20 | 31022441  | ASXL1  | NM_015338 | c.1934dupG       | p.G646Wfs*12 | 17.30% | Likely ONCOGENIC |
| <b>37</b> | IMPACT | F#1 | 4  | 10619648  | TET2   | NM_001127 | c.4823_4824delAT | p.Y1608Ffs*5 | 45.10% | Likely ONCOGENIC |
| <b>37</b> | IMPACT | F#1 | 17 | 7578208   | TP53   | NM_000546 | c.641A>G         | p.H214R      | 39.70% | Likely ONCOGENIC |
| <b>37</b> | IMPACT | F#1 | 17 | 74732959  | SRSF2  | NM_003016 | c.284C>A         | p.P95H       | 44.60% | ONCOGENIC        |
| <b>38</b> | RD     | F#1 | 21 | 36164448  | RUNX1  | NM_001754 | c.1427A>C        | p.V476A      | 1.20%  | UNKNOWN          |
| <b>38</b> | RD     | F#1 | 1  | 36932040  | CSF3R  | NM_000760 | c.2429A>G        | p.D810G      | 46.10% | UNKNOWN          |
| <b>38</b> | RD     | F#1 | 5  | 17083754  | NPM1   | NM_002520 | c.860_863dupTCTG | p.W288Cfs*12 | 3.30%  | Likely ONCOGENIC |
| <b>38</b> | RD     | F#1 | 2  | 209113113 | IDH1   | NM_005896 | c.394C>A         | p.R132S      | 2.40%  | Likely ONCOGENIC |
| <b>39</b> | IMPACT | F#1 | 6  | 15374449  | JARID2 | NM_004973 | c.148_149insCG   | E50Afs*8     | 87.00% | Likely ONCOGENIC |

RD, raindance; D, diagnosis; F, follow-up.

Supplemental Table 6 Summary of primary PDX mice

| Patients | NSG mice | Cells injected/mouse | hCD45 (%) in PB   |          | hCD45 (%) in BM | Leukemic blasts | pDCs     | Lymphocytes | Transplantable in 2° PDX mice |
|----------|----------|----------------------|-------------------|----------|-----------------|-----------------|----------|-------------|-------------------------------|
|          |          |                      | 3 months          | 6 months |                 |                 |          |             |                               |
| 001      | 1        | 1.3 million          | 2.86              | 59.2     | 99              | Y               | Y        | N           | Y                             |
|          | 2        | 1.3 million          | 4.44              | 55.9     | 95              | Y               | Y        | N           | Y                             |
|          | 3        | 1.3 million          | 7.28              | 53.7     | 97.1            | Y               | Y        | N           | Y                             |
| 002      | 1        | 374 000              | 15.3              | 16       | 5               | N               | N        | Y           | N                             |
|          | 2        | 374 000              | 43.9              |          | 35              | N               | N        | Y           | N                             |
| 003      | 1        | 300 000              | 0.39              | 2.59     | 0.9             | N               | N        | Y           | N                             |
|          | 2        | 300 000              | 0.36              | 5.98     | 1.0             | N               | N        | Y           | N                             |
| 004      | 1        | 186 000              |                   | 1.85     | 0.5             | N               | N        | Y           | N                             |
|          | 2        | 186 000              |                   | 1.80     | 0.4             | N               | N        | Y           | N                             |
| 005      | 1        | 600 000              | 0.15              |          | 0.09            | N               | N        | Y           | N                             |
|          | 2        | 600 000              | 0.16              |          | 0.2             | N               | N        | Y           | N                             |
|          | 3        | 600 000              | 0.18              |          | 0.1             | N               | N        | Y           | N                             |
| 006      | 1        | 2 million            | 10                |          | 4.22            | N               | Y (0.2%) | Y           | N                             |
|          | 2        | 2 million            | 5.1 <sup>a</sup>  |          |                 |                 |          |             |                               |
|          | 3        | 2 million            | 24.5              |          | 7.64            | N               | Y (1.8%) | Y           | N                             |
|          | 4        | 2 million            | 70                |          | 18.9            | N               | Y (2.6%) | Y           | N                             |
|          | 5        | 2 million            | 10.3 <sup>a</sup> |          |                 |                 |          |             |                               |
|          | 6        | 2 million            | 8.3 <sup>a</sup>  |          |                 |                 |          |             |                               |
|          | 7        | 2 million            | died              |          |                 |                 |          |             |                               |

a: mice died after 3 months evaluation.

#### Reference

1. Xiao W, Goldberg AD, Famulare CA, et al. Loss of plasmacytoid dendritic cell differentiation is highly predictive for post-induction measurable residual disease and inferior outcomes in acute myeloid leukemia. *Haematologica*. 2019;104(7):1378-1387.
2. Hänzelmann S, Castelo R, Guinney J. GSVA: gene set variation analysis for microarray and RNA-Seq data. *BMC Bioinformatics*. 2013;14(1):7.
3. See P, Dutertre C-A, Chen J, et al. Mapping the human DC lineage through the integration of high-dimensional techniques. *Science*. 2017;356(6342):eaag3009.
4. Villani AC, Satija R, Reynolds G, et al. Single-cell RNA-seq reveals new types of human blood dendritic cells, monocytes, and progenitors. *Science*. 2017;356(6335).
